# Supplementary material for: Pharmacological treatment in patients with aortic dissection
Source: HighWire-hosted journal article supplement (doi:10.1136/openhrt-2022-002082), 2022-11-01
Supplement: openhrt-2022-002082supp001_data_supplement.pdf [file openhrt-2022-002082supp001_data_supplement.pdf]

**Supplement table 1:** Drugs included in the study described as groups, subgroups and at specific drug level including ATC codes.

| Groups                                     | Subgroups                               | Specific drugs       | ATC codes                         |
|--------------------------------------------|-----------------------------------------|----------------------|-----------------------------------|
| <b>Anticoagulants + antiplatelet drugs</b> |                                         |                      | B01                               |
|                                            | <b>Any anticoagulants</b>               |                      | B01AA + B01AE + B01AF             |
|                                            |                                         | Warfarin             | B01AA03                           |
|                                            | <b>New oral anticoagulants</b>          |                      | B01AE + B01AF                     |
|                                            |                                         | Dabigatran           | B01AE07                           |
|                                            |                                         | Rivaroxaban          | B01AF01                           |
|                                            |                                         | Apixaban             | B01AF02                           |
|                                            |                                         | Edoxaban             | B01AF03                           |
|                                            | <b>Any antiplatelet drugs</b>           |                      | B01AC                             |
|                                            |                                         | Acetylsalicylic acid | B01AC06                           |
|                                            |                                         | Clopidogrel          | B01AC04                           |
|                                            |                                         | Ticagrelor           | B01AC24                           |
|                                            |                                         | Dipyridamol          | B01AC07                           |
| <b>Antihypertensives</b>                   |                                         |                      | C02 + C03 + C04 + C07 + C08 + C09 |
|                                            | <b>Beta blockers (all)</b>              |                      | C07                               |
|                                            | <b>Beta blockers, non-selective</b>     |                      | C07AA                             |
|                                            | <b>Beta blockers, selective</b>         |                      | C07AB                             |
|                                            | <b>Beta/alfa blockers</b>               |                      | C07AG                             |
|                                            | <b>Calcium channel blockers</b>         |                      | C08                               |
|                                            | <b>ACE inhibitors</b>                   |                      | C09A + C09B                       |
|                                            | <b>Angiotensin II receptor blockers</b> |                      | C09C + C09D                       |
| <b>Diuretics</b>                           |                                         | C03 + C09B + C09D    |                                   |
| <b>Lipid lowering drugs</b>                |                                         |                      | C10                               |
|                                            | <b>Statins</b>                          |                      | C10AA + C10BA + C10BX             |
|                                            | <b>Other lipid lowering drugs</b>       |                      | C10AB + C10AC + C10AD + C10AX     |
